# Supplementary material for: Relationships between alpha oscillations during speech preparation and the listener N400 ERP to the produced speech
Source: PubMed Central journal article supplement (PMC6110750; doi:10.1038/s41598-018-31038-9), 2018-08-27
Supplement: 41598_2018_31038_MOESM1_ESM.pdf [file 41598_2018_31038_MOESM1_ESM.pdf]

## Supplementary Material: Relationships between alpha oscillations during speech preparation and the listener N400 ERP to the produced speech

David A. Bridwell, Sarah Henderson, Marieke Sorge, Sergey Plis, Vince D. Calhoun

Supplementary Table 1: Sentence Stimuli and Cloze Probability of the Frequent Word.

| Sentence                                                | Frequent Word (expected) | Cloze Probability (expected) | Cloze Probability (unexpected) |
|---------------------------------------------------------|--------------------------|------------------------------|--------------------------------|
| For Thanksgiving dinner, we cooked a _____.             | Turkey                   | 1.000                        | 0.063                          |
| The dog heard a noise and began to _____.               | Bark                     | 1.000                        | 0.067                          |
| The chicken laid an _____.                              | Egg                      | 1.000                        | 0.071                          |
| At the pumpkin patch we picked out a _____.             | Pumpkin                  | 1.000                        | 0.118                          |
| Curiosity killed the _____.                             | Cat                      | 1.000                        | 0.118                          |
| The best part of waking up, is Folgers in your _____.   | Cup                      | 1.000                        | 0.133                          |
| Spiders have eight _____.                               | Legs                     | 1.000                        | 0.154                          |
| The grass is _____.                                     | Green                    | 1.000                        | 0.267                          |
| The cow said _____.                                     | Moo                      | 1.000                        | 0.313                          |
| You can't judge a book by it's _____.                   | Cover                    | 0.941                        | 0.118                          |
| For his magic trick, he pulled a rabbit out of a _____. | Hat                      | 0.938                        | 0.071                          |
| In the Fall, the leaves fall off of the _____.          | Trees                    | 0.938                        | 0.125                          |
| I was thirsty, so I took a drink of _____.              | Water                    | 0.938                        | 0.286                          |
| I took my dog for a _____.                              | Walk                     | 0.933                        | 0.059                          |
| He couldn't afford a new car, he needed more _____.     | Money                    | 0.929                        | 0.077                          |
| The sky is _____.                                       | Blue                     | 0.929                        | 0.143                          |
| At Christmas, Santa came down the _____.                | Chimney                  | 0.929                        | 0.182                          |
| I ate the soup with a _____.                            | Spoon                    | 0.917                        | 0.125                          |
| To celebrate my birthday we ate _____.                  | Cake                     | 0.882                        | 0.077                          |
| There was a test, so he spent the weekend _____.        | Studying                 | 0.875                        | 0.188                          |
| When you are sick, it helps to visit the _____.         | Doctor                   | 0.867                        | 0.125                          |
| In the Spring, the flowers begin to _____.              | Bloom                    | 0.857                        | 0.133                          |
| She hated swimming, she was afraid of the _____.        | Water                    | 0.824                        | 0.125                          |
| When he was five, I taught him to tie his _____.        | Shoes                    | 0.786                        | 0.200                          |
| They used treats to train their new _____.              | Dog                      | 0.769                        | 0.143                          |
| I pulled the mail out of the _____.                     | Mailbox                  | 0.750                        | 0.167                          |
| To listen to music, I turned on the car's _____.        | Radio                    | 0.750                        | 0.333                          |
| I ran five miles a day to train for the _____.          | Marathon                 | 0.733                        | 0.083                          |
| At work I sit at a _____.                               | Desk                     | 0.733                        | 0.143                          |
| She was really tired, so she went to _____.             | Bed                      | 0.714                        | 0.133                          |
| I started the lawn mower and mowed the _____.           | Lawn                     | 0.714                        | 0.167                          |
| To greet his owner, the dog began to _____.             | Bark                     | 0.692                        | 0.143                          |
| The Television show was interrupted by a _____.         | Commercial               | 0.688                        | 0.188                          |
| The sun was in her eyes so she put on a pair of _____.  | Sunglasses               | 0.667                        | 0.308                          |
| He sat down on the _____.                               | Chair                    | 0.636                        | 0.143                          |
| Instead of driving to Oregon, they decided to _____.    | Fly                      | 0.615                        | 0.235                          |
| It was cold outside so I wore a _____.                  | Jacket                   | 0.533                        | 0.118                          |

|                                                     |             |       |       |
|-----------------------------------------------------|-------------|-------|-------|
| At checkout, she reached into her purse for a ____. | Credit card | 0.438 | 0.118 |
| We visited the zoo to see the ____.                 | Lion        | 0.438 | 0.214 |
| There were crumbs on the floor, so he got a ____.   | Broom       | 0.400 | 0.182 |

Supplementary Methods- Instructions. At the onset of the experiment, the speaker was instructed as follows: “During the experiment, you will see a prompt for “humorous” or “serious”, followed by a sentence with the final word missing. During the “humorous” prompt you should fill in the missing word with something that is “humorous” and during the “serious” prompt you should fill in the missing word with something that is “serious”. For example, if the sentence is “I took my dog for a blank”, during the “humorous” condition you might say “I took my dog for a unicorn” and during the “serious” condition you might say “I took my dog for a walk. In most cases, the “humorous” ending won’t actually be humorous, but we want to encourage you to come up with something that is unexpected or creative.”

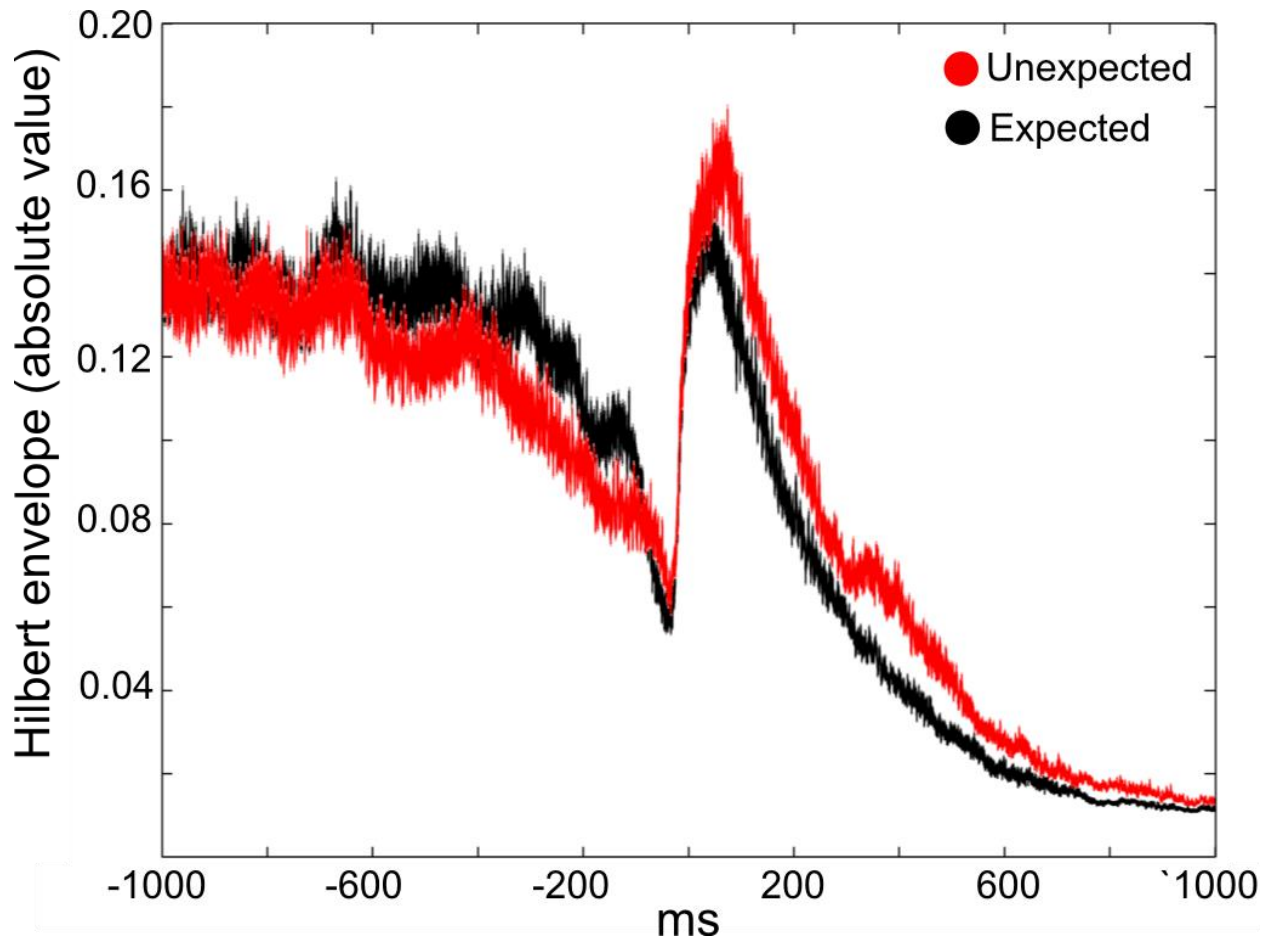

Supplementary Figure 1. Average speech envelope following the expected or unexpected sentence ending. The absolute value of the Hilbert envelope was calculated and averaged across subjects for the “expected” (black) and “unexpected” (red) conditions. There is a clear drop in spectral energy around 0 ms which corresponds to the onset of the final word. The timing of the peak decrease in spectral energy around 0 ms and the peak increase that follows appear similar. Since the sentence was spoken continuously, the final word immediately followed the prior words in the sentence. As a result, the speech envelopes is elevated in the interval preceding the onset of the final word.

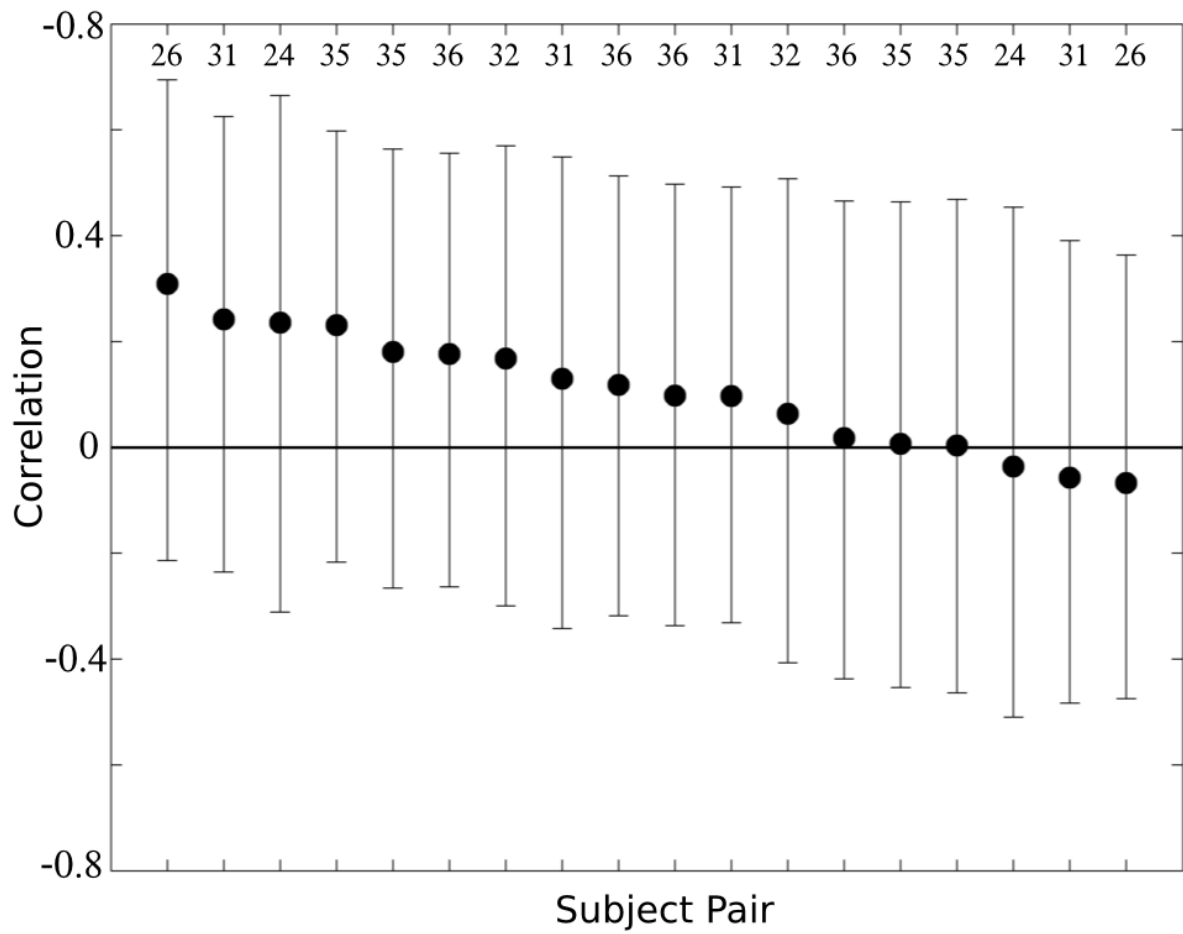

Supplementary Figure 2. The Pearson correlation coefficient (y-axis) between the speakers lower alpha band power and listeners N400 amplitude are indicated for each subject pair (x-axis). Errorbars indicate the 95% confidence interval and the number of trials used within each calculation are indicated at the top of the plot.
